# Supplementary material for: Influence of Resins on the Structure and Dynamics of SBR Compounds: A Solid-State NMR Study
Source: MDPI journal article supplement (doi:10.3390/app13031939), 2023-02-02
Supplement: s1 [file s1]

# Influence of resins on the structure and dynamics of SBR compounds: a Solid-State NMR study

Michele Pierigé <sup>1</sup>, Francesca Nerli <sup>1</sup>, Francesca Nardelli <sup>1,2,\*</sup>, Lucia Calucci <sup>2,3</sup>, Mattia Cettolin <sup>4</sup>, Luca Giannini <sup>4</sup>, Marco Geppi <sup>1,2,3,\*</sup> and Francesca Martini <sup>1,2,3</sup>

<sup>1</sup> Dipartimento di Chimica e Chimica Industriale, Università di Pisa, 56124 Pisa, Italy; michele.pierige@phd.unipi.it (M.P.), francesca.nerli@phd.unipi.it (F.Ne.), marco.geppi@unipi.it (M.G.), francesca.martini@unipi.it (F.M.)

<sup>2</sup> Istituto di Chimica dei Composti Organo Metallici, Consiglio Nazionale delle Ricerche, 56124 Pisa, Italy; francesca.nardelli@pi.iccom.cnr.it (F.Na.), lucia.calucci@pi.iccom.cnr.it (L.C.);

<sup>3</sup> Centro per l'Integrazione della Strumentazione Scientifica dell'Università di Pisa (CISUP), 56126 Pisa, Italy

<sup>4</sup> Pirelli Tyre SpA, 20126 Milano, Italy; mattia.cettolin@pirelli.com (M.C.); luca.giannini@pirelli.com (L.G.)

\* Correspondence: francesca.nardelli@pi.iccom.cnr.it (F.Na.), marco.geppi@unipi.it (M.G.)

## SUPPLEMENTARY MATERIAL

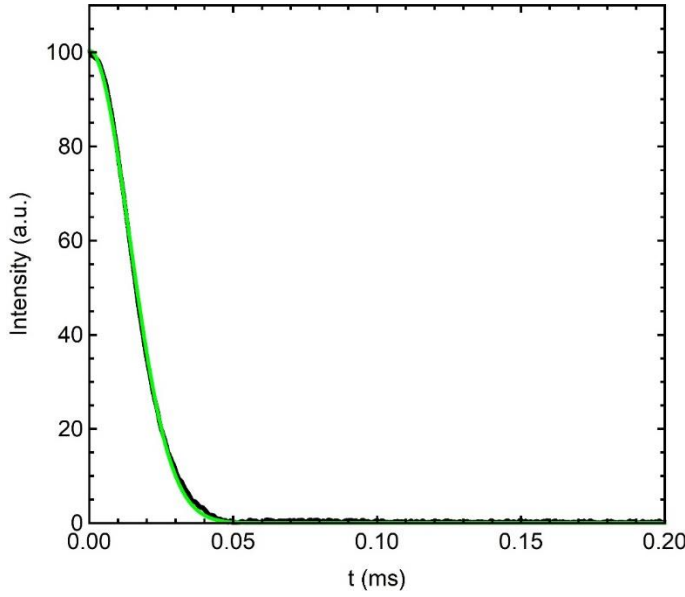

**Figure S1.**  $^1\text{H}$  FID (black points) and Gaussian fitting function (green line) obtained for Kristalex.

### $^1\text{H}$ - $^{13}\text{C}$ CP Dynamics

The  $^1\text{H}$ - $^{13}\text{C}$  CP dynamics was studied at 303 K for Kristalex, vSBR and vSBR\_k by acquiring spectra at different contact time values ( $\tau_{CP}$ ) and measuring the integral intensity ( $I(\tau_{CP})$ ) of specific signals. In particular, for Kristalex and vSBR\_k, the integral of the most intense sideband of the aromatic tertiary carbons of the resin (from 157 to 180 ppm) was considered in the analysis, whereas, for vSBR, the integral of the region of aromatic/alkene carbons (from 100 to 155 ppm) was taken. The  $I(\tau_{CP})$  curves of vSBR and vSBR\_k were fitted according to equation S1:

$$I(\tau_{CP}) = I_0 \frac{1}{1 - T_{CH}/T_{1\rho}} \left( e^{-\frac{\tau_{CP}}{T_{1\rho}}} - e^{-\frac{\tau_{CP}}{T_{CH}}} \right) \quad (\text{S1})$$

with  $T_{CH}$  being the rate constant for the polarization transfer process and  $T_{1\rho}$  the spin-lattice relaxation time in the rotating frame of  $^1\text{H}$  nuclei.

In the case of Kristalex, the  $I(\tau_{CP})$  curves were fitted according to equation S2:

$$I(\tau_{CP}) = I_0 \frac{1}{1 - T_{CH}/T_{1\rho}} \left( e^{-\frac{\tau_{CP}}{T_{1\rho}}} - e^{-\left(\frac{\tau_{CP}}{T_{CH}}\right)^\beta} \right) \quad (\text{S2})$$

with  $0 < \beta \leq 1$ , taking into account a distribution of  $T_{CH}$  values. For this sample,  $\beta$  was found to be 0.3.

The results of the fittings are shown in Figure S2;  $T_{CH}$  and  $T_{1\rho}$  values obtained from the analysis are reported in Table S1.

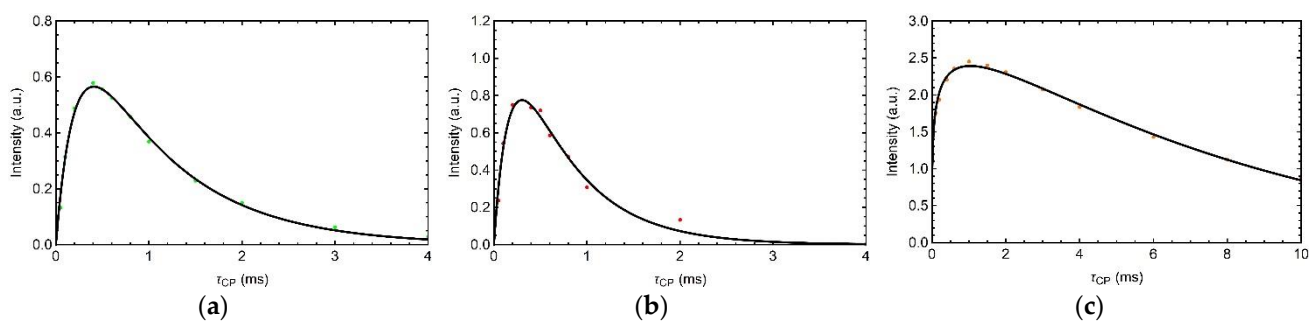

**Figure S2.** Integral intensities of the  $^{13}\text{C}$  CP/MAS signals (points) and fitting functions (black lines) obtained for vSBR (a), vSBR\_k (b) and Kristalex (c) as a function of the contact time  $\tau_{\text{CP}}$ .

**Table S1.**  $T_{\text{CH}}$  and  $T_{1\rho}$  values obtained from the analysis of the CP curves for the investigated samples.

| Sample    | $T_{\text{CH}}$ (ms) | $T_{1\rho}$ (ms) |
|-----------|----------------------|------------------|
| vSBR      | 0.2                  | 1.0              |
| vSBR_k    | 0.2                  | 0.6              |
| Kristalex | 0.7                  | 8.6              |

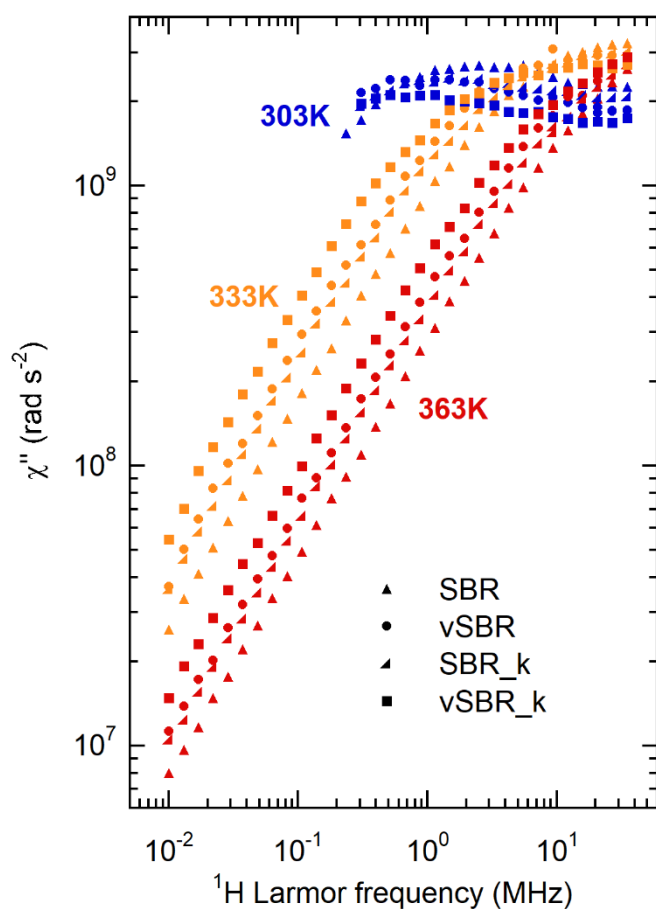

**Figure S3.**  $^1\text{H}$  NMR susceptibility curves of the investigated samples at the indicated temperatures.

**Table S2.**  $^1\text{H}$   $T_{1\rho,i}$  values and relative weight percentages ( $W_i$ ) obtained for vSBR and vSBR\_k at the investigated temperatures. Errors are  $\pm 1$  on the last digit.

| vSBR    |           |           |                    |                    | vSBR_k  |           |           |                    |                    |
|---------|-----------|-----------|--------------------|--------------------|---------|-----------|-----------|--------------------|--------------------|
| $T$ (K) | $W_a$ (%) | $W_b$ (%) | $T_{1\rho,a}$ (ms) | $T_{1\rho,b}$ (ms) | $T$ (K) | $W_a$ (%) | $W_b$ (%) | $T_{1\rho,a}$ (ms) | $T_{1\rho,b}$ (ms) |
| 303     | 83        | 17        | 0.7                | 4.4                | 303     | 87        | 13        | 0.6                | 4.9                |
| 313     | 73        | 27        | 0.9                | 5.0                | 313     | 79        | 21        | 0.7                | 4.4                |
| 323     | 64        | 36        | 1.3                | 6.6                | 323     | 70        | 30        | 1.0                | 5.1                |
| 333     | 53        | 47        | 1.7                | 8.7                | 333     | 60        | 40        | 1.3                | 6.6                |
| 343     | 43        | 57        | 2.3                | 11.0               | 343     | 50        | 50        | 1.6                | 8.4                |

**Table S3.**  $^1\text{H}$   $R_{1\rho}^{PWRA}$  (experimental),  $R_{1\rho}^{seg}$  (calculated) and  $R_{1\rho}^{pol}$  (calculated) obtained for vSBR and vSBR\_k at the investigated temperatures.

| vSBR    |                                 |                                |                                | vSBR_k  |                                 |                                |                                |
|---------|---------------------------------|--------------------------------|--------------------------------|---------|---------------------------------|--------------------------------|--------------------------------|
| $T$ (K) | $R_{1\rho}^{PWRA}$ (s $^{-1}$ ) | $R_{1\rho}^{seg}$ (s $^{-1}$ ) | $R_{1\rho}^{pol}$ (s $^{-1}$ ) | $T$ (K) | $R_{1\rho}^{PWRA}$ (s $^{-1}$ ) | $R_{1\rho}^{seg}$ (s $^{-1}$ ) | $R_{1\rho}^{pol}$ (s $^{-1}$ ) |
| 303     | 1257                            | 658                            | 599                            | 303     | 1388                            | 732                            | 656                            |
| 313     | 869                             | 292                            | 577                            | 313     | 1115                            | 378                            | 737                            |
| 323     | 559                             | 137                            | 422                            | 323     | 783                             | 195                            | 588                            |
| 333     | 360                             | 67                             | 293                            | 333     | 521                             | 101                            | 420                            |
| 343     | 240                             | 34                             | 206                            | 343     | 367                             | 52                             | 315                            |
